# Supplementary material
Source: Research Square preprint supplement (doi:10.21203/rs.3.rs-9167967/v1)
Supplement: Supplementary file 1 [file 7d1dbefb7c7ac806ff367361.docx]

**Ethyl Caffeate Suppresses Prostate Cancer Progression via PI3K/Akt Pathway Inhibition**

Kui Wang1,2,3,#, Yuewen Sun5,#, Xing Luo1,2,3,#, Tingting Chen1,2,3, Xiao Tan1,2,3, Jun Kong4,*, Ji Zheng1,2,3,*

1. Department of Urology, Urologic Surgery Center, Xinqiao Hospital, Third Military Medical University (Army Medical University), Chongqing, China.

2. Chongqing Engineering Research Center of Tumor Biomarker Translation, Chongqing Concept Verification Center of Innovative Biological Products, Medical Center for Prostate Disease Innovation and Translation,  Chongqing, China.

3. State Key Laboratory of Trauma and Chemical Poisoning, Third Military Medical University (Army Medical University), Chongqing, China.

4. Jiangsu Province Hospital of Chinese Medicine Chongqing Hospital (Chongqing Yongchuan Hospital of Chinese Medicine), Chongqing, China.

5. Department of Nephrology, General Hospital of Western Theater Command, PLA, Chengdu, China.

#: Contributed equally to this work.

*: corresponding author:

Ji Zheng, email address: jizheng023@aliyun.com;


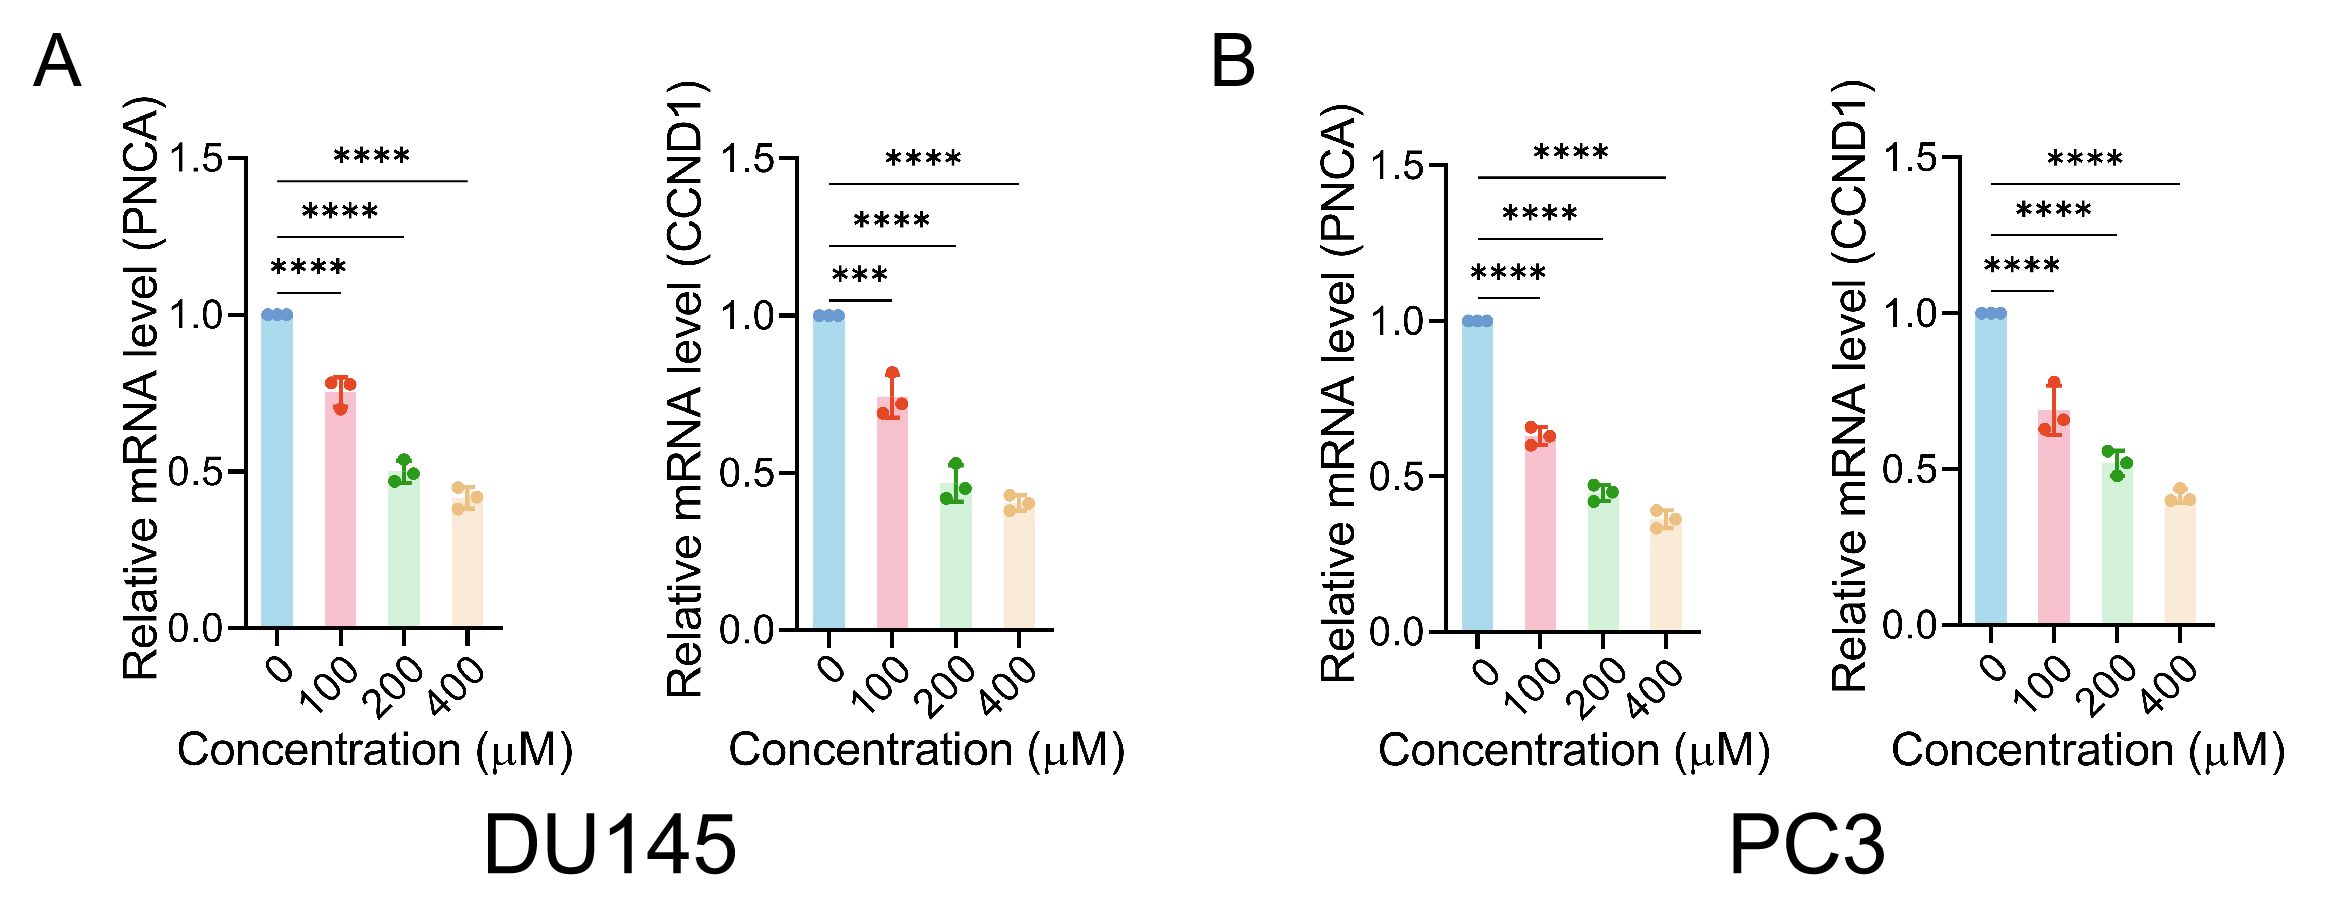


**Figure S1:** The mRNA expression levels of CCND1 and PCNA in (A) DU145 and (B) PC3.*P < 0.05, **P < 0.01, and ***P < 0.001 indicate statistically significant differences. Student's t-test.
