# Supplementary material
Source: Research Square preprint supplement (doi:10.21203/rs.3.rs-9167967/v1)
Supplement: Supplementary file 1 [file 07deb903abfb7e05a9c4e5b3.xlsx]

## Sheet: combined_names
potential targets
EGFR
CA6
AKR1B10
PTPN1
CA5B
CA5A
LCK
FYN
AKR1C4
AKR1C2
ESR1
ESR2
PTGS1
SLC6A2
ERBB2
FLT1
FLT4
PDGFRA
AURKB
KDR
AURKC
AURKA
CA4
GUSB
PLAA
TTR
MET
AKR1C3
CA13
ELANE
CDK4
CDK2
ST6GAL1
PDGFRA PDGFRB
TMIGD3
ALPL
PARP1
TNKS2
TNKS
ALPG
DAO
MAPK1
MIF
ADORA1
GRM4
CA3
HDAC4
CBFB
RPS6KB2
CDC25A
ADORA2A
CDK5R1 CDK5
GRK6
XDH
PDPK1
GSK3B
ALOX15B
RET
CYP11B2
GPR84
DYRK1A
DYRK1B
CA2
CA7
CA1
CA12
CA14
CA9
AKR1B1
ALOX5
MAOB
MMP9
MMP1
MMP2
MAOA
KLF5
TDP1
APEX1
NFE2L2
ERAP1
NR1I2
TRIM24
NFKB1
SLC6A5
TOP2A
PSMC2
DPP9
CTSD
PIN1
DPP8
ALOX12
CLK4
GLRA1
RORB
HTR2C
GPBAR1
PSMA1
STAT1
NQO2
CHRNA4
FPR1
NR4A1
SLC2A1
ADAM10
PIK3CA
CYP2A6
GLS
SCN3A
KDM1A
FCGRT
THRA
NOS2
METAP2
ALX1
MAP2K2
NR3C2
CCR2
RXFP1
NTRK3
ABCC1
ACACA
FGR
UBA2
GSTP1
CCR1
GRIA2
CHRNA1
CDC25C
C5AR1
CYP3A4
PDE3B
GRIN1
CSNK2A1
TFPI
PDE11A
PRCP
TLR4
GRK5
RPS6KA5
BMP2K
AHCY
PDE3A
SLC1A1
S1PR4
NA
