# Supplementary material
Source: Research Square preprint supplement (doi:10.21203/rs.3.rs-9167967/v1)
Supplement: Supplementary file 2 [file 7545d9660043a852bd0792f7.xlsx]

## Sheet: merged_genes
Gene
AGK
AIS
ALKBH3
AMD1
ANO7
ANP32C
ANXA7
AR
ARHGEF26
ARLNC1
BHD2
BPH
BRCA1
BRCA2
BRD4
BROVCA1
BROVCA2
BROVCA5
C1QTNF9BAS1
CAV1
CCND1
CD82
CD8A
CDH1
CDKN1B
CDKN2A
CEACAM21
CHEK2
CHUK
CPA4
CRCS2
CREB3L4
CYP3A4
DAB2IP
DEK
EGR1
EHBP1
ELAC2
ELOVL7
EPHB2
ERBB2
ERF
ERG
ERGIC2
ETV1
ETV4
ETV5
EZH2
FGF8
FOLH1
FOXA1
FOXM1
FOXO3
GDF2
Gene_Symbol
GHRH
GHRHR
GNMT
HDAC1
HIP1
HMGN2P46
HMPS1
HNF1B
HOXB13
HPC1
HPC10
HPC11
HPC12
HPC13
HPC14
HPC15
HPC2
HPC5
HPC7
HPC8
HPC9
HPCX1
HPCX2
HPCX3
HPN
IGF1
INHA
JAZF1
KCNMA1
KLF6
KLK15
KLK4
KLRK1
KRAS
LEP
LIMK1
LMTK2
LRRC26
LSM1
LYNCH1
LYNCH2
LZTS1
MAD1L1
MED12
MIR100
MIR148A
MIR449A
MIR616
MIR99A
MIR99B
MLH1
MSMB
MSMP
MSR1
MTOR
MUS81
MXI1
MYC
NIBAN1
NKX3-1
NPL
NWD1
OR51E1
OR51E2
OXER1
PAGE4
PALB2
PARM1
PARP1
PATE
PAWR
PCA3
PCAT1
PCAT18
PCAT19
PCAT2
PCAT29
PCAT4
PCDH11Y
PCGEM1
PDZD2
PER1
PI5
PIM1
PLXNB1
POTED
PPARA
PPARG
PRNCR1
PRRT3AS1
PSCA
PTEN
RALGAPA2
RASSF2
RFWD2
RFX6
RNASEL
SCHLAP1
SFMBT2
SH3YL1
SHBG
SHH
SLC39A9
SLC43A1
SLC45A3
SMAD4
SMG5
SNORD50A
SOCS2AS1
SOX9
SPANXB1
SPOP
SPRY1
SRD5A2
SRD5A3
STEAP1
STEAP2
STEAP4
SXGQTL1
SYT7
T2D
TBC1D3B
TENT5B
TFPI2
TMEM79
TMPRSS2
TMSB15B
TNS4
TP53
TPDS4
TRIM68
TRPV6
TUSC3
WASHC5
WDR77
WNT5A
ZBTB7A
ZFHX3
HER2
ESR
MMP-1
MMP-2
MAO-A
PDGFRA
mTOR
CB2
CDK4
CDK6
AKR1C3
ESR2
GCPII
MMP-7
MAO-B
OPRS1
PIK3CA
PIK3CG
S17AH
STS
TK1
VDR
ADORA2A
AOX1
BCL-2
CB1
CYP11A1
CTLA-4
IDO1
IFNG
ODF
RXRG
ADRA1A
EDNRA
GNRHR
CSF2
ICAM1
IL2
LHCGR
PD-L1
PD-1
CD3E
IL11RA
GNRH1
SRD5A
CD28
SLC19A1
SLC46A1
hDNA
AKT1
TERT
AURKB mRNA
AURKA
AURKB
AURKC
CDK2
PLK1
KLK2
MDM2
FLT-4
PRKDC
NR3C1
PIK3CB
KLK3
SGK1
TLR4
BRD2
BRD3
S100A9
CLU
CREBBP
DKK1
XPO1
GLIPR1
NRAS
LTB4R
TNFRSF4
CD40LG
TNFSF10
TLR2
TLR9
CD276
SLC44A4
CD55
DPP8
DPP9
EIF4EBP2
ITGAV-ITGB3
ROR1
ACP3
TSG101
DKK3
HSPB3
TPBG
sch PNP
SLC5A5
CD3G
EPCAM
TNFRSF17
EED
IGF2
KISS1
TMEM97
GD2
FRD
HSPB1
KISS1R
CYP46A1
BMPR2
EP300
NGEP
PAGE5
MAO
PARP
CD3
V1R
EMBP
BET
CUL4A/CUL4B-DDB1-CRBN
RXR
TLR
TubP
MSH2
EGFR
ATM
MSH6
BRAF
APC
CTNNB1
PMS2
STK11
HRAS
RB1
RAD51C
BRIP1
NBN
BARD1
RAD51D
MET
RET
MUTYH
POLE
CHEK1
POLD1
RAD51
BLM
MIR21
H19
ARID1A
PVT1
UCA1
MRE11
MALAT1
ATR
MIR143
MIR221
MIR17
FANCA
MEN1
MIR145
MIR30A
AFAP1-AS1
NEAT1
NTRK1
MIR125A
MIR182
FANCC
MIR126
GAS5
CCNE1
MIR141
MIR214
SNHG1
CCAT1
XIST
C11orf65
MIR31
FANCM
MIR195
MIR205
KIT
FGFR2
DANCR
NF1
MIR20A
CDK12
TUG1
MIR222
FANCD2
FANCL
MIR146A
RAD54L
IDH1
MIR27A
RAD51B
MIR223
OIP5-AS1
MEG3
MIR106A
MIRLET7D
MIR224
MIR34A
MIR29A
NORAD
MIR183
SNHG7
MIR10B
CASC2
KCNQ1OT1
MIRLET7B
MIR210
ZFAS1
SNHG16
PCAT6
MIR199A1
HOTAIRM1
MIR127
BLACAT1
FOXO1
CASC11
FGFR3
MIR23A
MIR4435-2HG
AGAP2-AS1
MIR23B
CCAT2
DGCR5
HIF1A
HCP5
MIR191
SNHG15
MIR25
MIR181A1
TTN-AS1
MIAT
MIR149
MIR22
SNHG12
LRP1B
SNHG3
SNHG6
SNHG17
MIR296
MIR27B
SOX2-OT
KMT2D
HOTTIP
HOXA11-AS
MIRLET7C
ESR1
CRNDE
ABRAXAS1
MIR96
TGFBR2
RAD50
CERS6-AS1
LINC00261
BCAR4
SNHG20
MIRLET7G
FGFR1
DLEU2
TSC2
MIR15A
MILIP
HAGLR
CBR3-AS1
NNT-AS1
GHET1
MIR181B1
SNHG8
LINC00662
HCG18
ALK
MCM3AP-AS1
GLI1
ZNF667-AS1
ZEB1-AS1
BMPR1A
MIR320A
MIR26B
LINC00963
ZEB2-AS1
UNC5B-AS1
MIR32
FEZF1-AS1
IQANK1
PMS1
LINC00665
HCG11
SMARCA4
MIR10A
TSC1
AXIN2
MIR151A
MIR29B2
RHPN1-AS1
MIR497
HOXA-AS2
SDHB
SNHG4
SNHG11
PPP2R2A
CTNNA1
LINC00473
LINC00518
MBNL1-AS1
MIR16-1
AATBC
LINC00467
MAGI2-AS3
LEF1-AS1
MIR199B
LINC01116
CDKN2B-AS1
PTCH1
ERBB3
MIR30B
FOXP4-AS1
MIR202
ADAMTS9-AS1
PIK3R1
SRC
MIR345
IGF2-AS
POLK
MAP2K1
MUC6
MSH3
SNHG9
ABCC4
ERCC2
MSC-AS1
VIM-AS1
ERBB4
DICER1
CHD1
NOTCH1
KDM4B
KDM3A
LNC-LBCS
CLPTM1L
SDHC
MIR22HG
MIR370
NEK9
MIR503
CASP8
SNHG10
MIR184
FGF14-AS2
EOLA1-DT
TGFBR3
FOXC2-AS1
MIR375
EXOC2
BLTP2
VHL
TNFRSF8
UBAP2
LINC00115
EIF3J-DT
ZKSCAN1
TRRAP
PTPN3
VPS9D1-AS1
WT1
SCUBE3
POU3F3
MIR491
TTTY15
MAPK10
LINC00920
MXRA5
GEN1
KAT7
RHOBTB2
PCBP2-OT1
SKIL
LINC00641
PYHIN1
MIR498
PREX2
HOTAIR
HIPK3
PCSEAT
MIR124-1HG
CACNA1G-AS1
MIR198
SMO
PTPRD
MIR92A2
LAMA5
EMX2OS
CTSE
SLC25A25-AS1
PCAT14
PCHILR
RNF43
ATG13
GASAL1
BDNF-AS
FH
SNHG33
SERPINB4
UBE2R2-AS1
POLN
GRM8
BUB1B
NTHL1
SMIM31
ARHGEF15
YTHDC2
USP28
ZNF224
DLL1
ZMAT3
FBXW7
FAM131B-AS2
BAP1
PAK4
ENPP7
BABAM2-AS1
ZNF304
MAGI2
MED1
IFNG-AS1
GFRA1
SEZ6L
ARMC12
RLIM
MIR155
KCNN3
EIF4G3
BTNL2
IL33
GREM1
CSMD2
LINC00161
APP
MTO1
MAML1
MYCBP2
MUC16
GFRA3
TRIM52-AS1
PTGDR
PPP2R5C
CDKN2B
RAF1
DPPA4
SHCBP1L
SDHD
NTN4
HTR2C
STAT3
KIR2DL3
LMAN1L
ENOX1
F11-AS1
SMARCB1
KIR3DL1
SMUG1
THBS3
GDF10
USP48
ERCC4
MUC17
ENTPD3
RECQL4
ING4
ADAMTS3
GNGT1
PPP1R3C
DIS3L
OXA1L
LINC00173
FPR1
SCN11A
SV2B
MIR29C
SSBP2
ITGAD
IDH2
ANO9
SPATA18
FAM83C
CHAC1
MIR200C
FGD2
ADRM1
NELL1
PIGH
KIF12
STX8
GNAS
GRWD1
SDHA
CHGB
STRADB
MYO16
TRIP12
KLHL20
RBAK
CYSLTR1
CBY1
DHX29
ITIH5
SLC46A3
NTRK3
AKAP1
NF2
PDE7B
DSCAML1
INTS3
TMCO5A
WDR49
AKAP9
PLB1
MYRF
BAX
ARK2C
COPS6
FAM66C
ZDHHC8
TRPM3
MACF1
TBX20
ZNF184
THSD7B
RERGL
LINC00304
PTPN11
PLEKHG1
BTBD16
TAS2R20
PRSS22
LINC01213
GABRB2
PARD3
PCDHA2
PCDHA7
ZP4
RPL10L
MIR200B
SLC8A3
CADPS
RBMS3-AS3
CNTFR
CFAP43
MLH3
SLC6A9
POLR2E
WDFY3
RASAL2
ARPP21
ZNF100
ENTREP1
CCDC171
IRGQ
PALM2AKAP2
C8orf44-SGK3
C3AR1
ABCE1
SYNGR1
ZNF431
SIGIRR
GPR55
SF3B3
ABCG4
ARHGEF25
NIPA2
HEPACAM2
MIR521-1
ERCC5
NRCAM
TRPC4
SORBS1
TSHZ3
ACRV1
AGBL4
ZSCAN2
BNIP5
OR4C12
IDH1-AS1
ZNF136
MIR335
MIR200A
NTRK2
JUN
ATP2B4
SLC13A3
ATP6V0A1
GAPDHS
KCNJ4
PKD2L1
CABIN1
ARAP3
CKAP5
PDP2
SORCS1
TSPAN5
ADAT1
CAND1
GABRG1
NAPB
PHF2
PODN
PTPN21
NETO2
PPP6R2
RPS6KC1
SCRN1
ASPRV1
BRF2
CDKN2AIP
KATNAL2
KCNF1
MRPL46
PCDHA1
PDZRN3
PPRC1
ABCF3
DNAH9
KIF16B
KRT33A
MAMDC2
NECAP2
PCDHA9
SBNO1
UNC79
ARHGAP20
DPH7
GPR26
HIPK4
MTBP
PCDHA10
PLEKHG4B
SLC25A47
ZNF473
EFCAB6
DGCR6L
DNAH3
FAXC
LARP1B
PCDHA4
PCDHA5
PCDHA6
PCDHA8
PCDHB1
TRIM34
URB2
ZNF419
FAM13C
ITPRIPL1
KIAA1755
KPRP
ZNF48
TSNAXIP1
OR5AC2
OR6K2
SLC35G1
ZNF287
ZNF560
ZNF776
OR14A16
OR5L1
ZNF717
ZNF772
OR1S2
OR2T1
OR2Z1
ZNF534
ZNF595
OR8K3
LINC00160
SAP30L-AS1
TMEM147-AS1
B3GAT1-DT
LINC01611
LINC01679
NXTAR
NRG1
IL1B
SOD2
CDKN1C
MIR140
IL6
MIR18A
MITF
PRKAR1A
FLCN
WRN
MIR139
BCL2
GATA2
MIR106B
CD274
SMAD3
MIR93
XPC
IRF1
MIR30E
SMAD2
RUNX1
MIR34C
PART1
DDB2
MIR150
HULC
RAD51L3-RFFL
ATRX
MIR146B
FHIT
TGFBR1
FANCG
MIR204
DLEC1
AXIN1
FANCF
MIR9-1
CDKN1A
FANCE
SPRY4-IT1
FAS
STAT1
SDHAF2
MAP3K1
MIR19A
DNMT3A
MIR142
AGO2
CTLA4
TMEM127
XRCC3
MIR424
FASLG
IL1RN
FGFR4
MAP2K4
FANCI
TFF1
GATA3
TERC
MIR152
MIR34B
IGF1R
XRCC2
MIRLET7E
ERCC3
MIR122
MIR101-1
CDC73
AXL
AKT3
MAPK1
CXCR4
MIR185
MAP2K2
MUC1
MIR125B1
SHC1
MIR324
ITGB1
ERCC1
HNF1A
MIR15B
LINC00673
MIRLET7F1
SPINK1
CASC15
NFE2L2
BUB1
SNHG14
MIR24-1
XPA
FLT1
CYP17A1
MIR192
ROS1
MIR429
PCAT7
MIR338
SETD2
MGMT
HMMR
KRT7
RASSF1
PPM1D
RB1CC1
TCF7L2
MIR107
SLX4
MIR328
SMAD7
RARB
LMNA
MAX
MIR133B
LINC00460
MIRLET7I
MIR212
GALNT12
SBF2-AS1
BCAR1
PDCD1
PBRM1
MIR130A
PDGFRB
JAK2
MIR181C
LINC00511
NKX2-1
SMARCA5
PIK3CD
DLEU1
CDC25B
RECQL
TGFB1
POT1
PTK2
SOX2
DLC1
KDR
MIR373
WEE1
NFKB1
KDM6A
MIR211
MIR339
MIR361
AKT2
MIRLET7A1
MTA1
RABL3
PRF1
DROSHA
WWOX
ZEB2
KRT20
PIK3R2
LINC01234
CCND3
STAT6
ABCC1
KMT2A
MIR374A
NPM1
MIR26A1
LINC01194
ENG
ITGA5
TP63
ABL1
SOS1
MIR193B
GSK3B
MIR130B
NSD2
MIR342
GPC3
CCND2
CASR
CASC8
CSF1R
KEAP1
MIR95
JAK1
MIR124-1
NCK1-DT
CDKN3
MIR215
FLT3
MIR377
CCL2
BIRC3
ZFPM2-AS1
MIR331
EFNA1
NCOR1
MIR132
MIR542
LDLR
SUFU
RHOA
PHB1
DNMT1
HGF
ANXA2
DSCAM-AS1
PLA2G2A
TP73
KMT2C
MIR92A1
THADA
GSTM3
FENDRR
MYCN
RINT1
MIR128-1
MIR197
RELA
TNFRSF10B
TNF
DCTN5
MIR136
SLC67A1
PTK2B
XIAP
EPHB4
TET2
MIR33A
BMI1
MIR494
PDGFB
IGF2R
LCP1
TRIM24
CDK1
PRKCA
EGF
CTBP1-AS
FN1
NFKBIA
SPDEF
CASP3
MIR425
MMP1
PPP2R1A
MIR508
TYMS
MAPK3
RPS20
CEBPA
MIR301A
FLT4
CYP24A1
LEF1
MKI67
ODC1
METTL3
MIR134
RARA
ITGA2
DOCK1
MT-CYB
NOTCH2
DNMT3B
MIR17HG
EXT2
MCL1
MIR372
FGF10
MIR28
MIR148B
ADAMTS9-AS2
CDC6
CD44
FGF3
ADIPOQ
CFTR
PDK1
CASP9
HEIH
MIR103A1
HSP90AA1
VEGFA
MIR135B
MIR155HG
BTK
ABCB1
PRKACA
MMP2
CTCF
KCNH2
E2F1
CDC25A
FADD
VEGFC
CTAG1B
NME1
SOCS1
MIR432
MIR186
CD70
PRKN
DIS3L2
CALR
PRMT5
MIR216A
FOS
STAT5A
CBS
LINC-PINT
MDM4
FGF4
CASP10
EWSR1
PCSK9
BCL6
ACVR2A
MC1R
ENO1
DCC
AOPEP
MT-CO1
KIF1B
HMGA2
GRB2
BMP6
TBX3
CDKN2C
CTBP1-DT
MIR483
DCST1-AS1
SMARCA2
DDR1
EXO1
BAD
STAT5B
NDRG1
MYD88
B2M
NSD1
MIR98
PAK1
BIRC5
LIG4
BMP4
CASC19
CD40
UBE2C
PDCD1LG2
KITLG
FLNA
VEGFB
CSF1
CYP19A1
FGF2
HLA-B
UFC1
ABCA1
TOP2A
GDF15
ETV6
SUZ12
MELK
NT5E
MMP9
IL10
MIR378A
CREB1
ITGA6
ADAM9
MYB
PCNA
INSR
BCR
HLA-A
EPHA3
FANCB
OGG1
MIR144
MIR30C1
PTGS2
MAPK8
LINC00324
CTAG2
IL7R
BCL2L1
NOTCH3
LPAR3
XBP1
HAGLROS
MIR193A
PTK6
PALLD
NFATC1
MIR196B
GSTP1
MAPK14
HDAC4
CUL1
SEPTIN9
ETS1
CDC25C
KLF4
TGFB2
TNFRSF9
MCM2
KDM1A
MIR452
LINC00668
SERPINE1
PAX8
PRAC1
PRKCB
SPP1
ATP7B
MBD4
CLDN7
BMP7
ATG5
DMTN
PAX5
NR2F2-AS1
VEGFD
POU5F1
IL3
ASB16-AS1
MMP14
HOXA-AS3
NQO1
TGFA
E2F2
BCL2L11
IRS2
SOX4
GNAQ
NAB2
EPOR
CKS1B
TWIST1
TOP1
GNA11
KRT8
CEACAM5
CXCL8
BMP2
NOTCH4
PPP2R1B
MME
SLC2A1
SP1
GREB1
S100B
RHEB
EXT1
PRKCD
XRCC1
NCOA2
MMP7
NFKB2
MIR20B
DERPC
IL6R
SMARCE1
CADM1
EIF4EBP1
CD4
RHBDF2
PPARD
INHBA
MIR129-1
NCOR2
RAC1
EPHA2
NCOA3
ABCG2
EPAS1
ACTB
SNAI2
LZTR1
MIR340
TMEFF2
CDH3
PHOX2B
PTH
RAD54B
PLAU
ACTA2
PKM
BAK1
PRSS1
E2F3
TYMP
HSD17B1
INS
REPS2
FGF6
ST8SIA6-AS1
AREG
MIR582
SSTR1
YAP1
CYCS
PML
MIR330
KLK10
FOXP1
IL4
RASA1
BID
TPX2
PRSS8
PDPN
SERPINB5
FBN1
PGR
GAPDH
MAP3K6
CP
LCK
RBBP8
NBR2
PHLPP1
PRAC2
TGFB3
GSTM1
STK4
GLI2
RASA2
CYP2A6
SYP
MIR196A1
MIR486-1
MYCL
PBX1
RICTOR
SLC39A1
AHR
CTSD
RPTOR
KRT18
TFAP2A-AS1
HIF1A-AS2
IGF2BP3
FASN
MUC4
CDH2
PTPRC
CLDN3
TMC6
BIVM-ERCC5
ARAF
CDX2
APAF1
CALCA
CDC42
LINC00472
MIR302C
KRT5
CCNA2
THBS1
HDAC9
HNRNPK
PIK3R3
MAF
GRHL2-DT
CD36
IL1A
MIR532
TYK2
RXRA
MUC5AC
COL1A1
ACTC1
NCOA4
DSP
SQSTM1
TNFRSF1A
CCNB1
PXN
IGFBP3
PCOTH
COL3A1
PTHLH
PEG10
SPARC
GADD45A
CD27
TRAF5
ATF1
RPS6KB1
CFLAR
JAG1
MCC
CXCL12
SNAI1
GSN
SKP2
HSD17B3
SOCS3
TCF4
VRK1
BIRC2
IL17A
PEBP1
EML4
FGF7
GRP
PDPK1
MIR423
APEX1
CD34
DNTT
GPER1
LDHA
CEP290
TUSC8
IRS1
TRPM8
FAT4
WRAP53
WNT1
MIR99AHG
ATRIP
HSD3B1
CHGA
TNFRSF14
CCNG1
PTCH2
PHGDH
PKHD1
HSPA4
PECAM1
CXCR2
DSG2
ERCC6
BDNF
CSF3
IGFBP6
BBC3
LYN
HBEGF
CD80
TYR
CTNND1
IL7
MIR30D
UIMC1
JUP
SLC5A8
FOXE1
XAGE1B
VIM
JAK3
RIPK1
TMEM132E
CYP1A1
AFP
HNF4A
ITGAV
TOP2B
IL2RA
TIMP3
ID1
BTG2
MSLN
YWHAE
CCNA1
MIR590
RTEL1
LGALS3
HSD3B2
ADAM17
FGF9
PROM1
TUBA4B
FOXO4
APOB
VIRMA
ANXA5
KRT19
VTN
MIR154
MIR605
SELENBP1
MIR219A1
AIP
HDAC6
HSPD1
TSHR
EREG
NRAD1
MIR29B1
RYR1
TNFRSF10A
PDGFRL
BMPR1B
ILK
HOXA9
TIMP2
NRP1
NQO2
RUNX3
FGF1
CASP7
MIR455
ACVR1
HSD17B4
MST1R
LIAT1
TEK
TIMP1
ENO2
AZGP1
GJA1
ITGB4
IKBKB
CCL5
IKBKE
TCHP
MIR511
SCGB1D2
REST
HSPA5
FMN1
PGM5-AS1
GPC6
CARM1
CASP1
MAGEA3
PATE1
ANGPT1
ICOS
NAT2
SST
SPINT2
PIM2
XAGE1A
BAG1
NOS2
CXCL1
MIR485
DVL1
MIR675
CCN2
ELOC
LAMC2
BECN1
SBDS
SF3B1
XRCC6
CDH13
HMGA1
ALB
CD86
MYH11
MIR584
MAP3K7
PLAUR
HMOX1
KCNQ1
SPRED1
HLA-F-AS1
LATS1
CCNE2
MIR574
MYLK
FOXP3
ADAR
NCAM1
HAVCR2
DDIT3
MIR497HG
RYR2
CCND2-AS1
PIK3C3
KLF5
PRUNE2
XRCC5
TRIM28
REL
DAPK1
TP53BP1
H3-3B
CD226
CYLD
LGALS1
DAXX
MPO
PMEPA1
DIABLO
TPD52
TLR5
CD9
ELAVL1
MUC2
TGM4
ZEB1
KLK8
ESRRA
CTSB
HMGB1
NCOA1
FSCN1
TRB
EIF3H
KDM5D
CD164
PRPF8
ZNF407-AS1
MIR628
PAGE1
CYP1B1
ETS2
TNFRSF11A
RBM15
EAF2
LEPR
CUBN
RPS27A
IRAK4
GRPR
ID4
RAD52
MRPS30-DT
S100A8
S100A4
TPM1
LOX
RAP1A
CAGE1
IFNA1
PRKCE
TUBB3
LIF
CCR7
ESS2
CA9
CIP2A
CDH5
EZR
U2AF2
EIF2AK3
HEY1
HK2
KDM5A
TNFSF4
DDX41
SFRP1
TSPY1
IL24
MDC1
MYO18A
MIR627
FCGR3A
CRP
MSH5
HAS2
ST14
CDK7
URI1
EHMT2
CDH17
IL18
PXDN
PLG
ITGB3
MIR708
TFAP2A
USP7
MIER3
LRBA
TRGC1
SERPINB2
ZMYND8
GATD3
TCF3
RACK1
LUADT1
FOSL1
POMC
CD19
H2AX
HDAC2
NPSR1-AS1
ANGPT2
MMP3
IL15
PTOV1
LINC01819
MMP13
CYP2E1
REV3L
CUL3
VCL
KRT14
ATP4A
TXN
MAK
NGFR
GAS6
KDM5C
IL11
TNFRSF10D
PBOV1
ATF3
CEACAM3
S100A2
TFRC
MIR135A1
PLCG1
POSTN
DPP4
VSIR
FLI1
CCNB2
ANXA1
CD46
LNCARSR
WNT3A
TBC1D3
KDM5B
SPEN
XRCC4
CXCR3
EIF2AK2
PRPF31
ARHGAP26
HOXA5
PAK6
HFE
MIR138-1
YBX1
EPCART
MIR371A
CXCL10
MMP11
LAG3
LINC01123
MIR188
CTNNA2
ADAM15
EIF4E
MIR133A1
LRP6
AMACR
TTK
PMAIP1
IFI27
CCL20
IFNB1
HSPA1A
SPANXD
F3
CCK
RELB
IGFBP5
CLDN4
TNFSF11
E2F4
MIR409
MTDH
ALDH1A1
DDX53
CD59
BSG
MYBPC3
SERPINF1
ADAM12
PTGS1
CEP57
CSF3R
WNT2
IL13
BCL2L2
DUSP1
PGK1
ALOX15B
RBL2
STUB1
CTTN
CDKN2A-AS1
SOCS2
HPSE
IL6ST
KLLN
HMGCR
PDS5B
PKD1
ALOX5
FGF5
ENTPD1
CTBP1
RHOC
HSP90AB1
DKC1
CCR5
ARNT
DNAH8
CD63
PRL
TERF2IP
EPB41L4A-DT
FBXO11
MYBL2
SKP1
GZMB
TIMELESS
STMN1
SH2B3
FGF17
CSNK2A2
PTGER4
PKN1
SMARCC2
AGR2
EPHA1
IL1R1
NGF
CYP1A2
PRLR
EEF1A1
BTLA
PTTG1
IGF2BP1
INTS6
ELK1
CD79A
HSPA8
CEBPB
IGFBP7
STEAP3
IL13RA2
IGFBP2
HABP2
SLC34A2
MIR382
MTHFD1
TFE3
SCGB1D1
SLC25A15
CASC21
MIF
BTRC
AIFM1
CTRC
LIN28B
GPX4
IRX5
HPRT1
TIAM1
GLS
PTPRJ
PIP
TBCE
KLK6
RRM2
NOS3
YY1
SSX2
MIR187
ACD
CD24
MAPK9
CRK
SFN
SFRP4
CDH11
H3-5
VTCN1
SMARCC1
SP3
ACP4
S100A6
VCAM1
DNA2
MIR518A1
RRAS
WIF1
MACROD1
CXCR1
SRF
TRAF3
ABCC3
INPP4B
RMI1
CLDN1
GAPLINC
SIRT1
ANKRD26
KCNA3
YTHDF1
HSF1
TRPS1
TMEM43
LATS2
TUBB
ROCK1
ASXL1
NR4A1
AGER
CENPF
SDC1
SCG5
RECK
LRATD2
ANPEP
ALPP
TXNRD1
S100P
RSPO2
GFI1
TNNT2
DMRT1
IGFBP4
PCAT5
LRP5
PDGFA
TFF3
CASP2
CSTA
YTHDF3
MIR19B1
[truncated: 3,675 more rows]
