# Supplementary material
Source: Research Square preprint supplement (doi:10.21203/rs.3.rs-9167967/v1)
Supplement: Supplementary file 4 [file aa85c9a99ab8a753b4ef1383.xlsx]

## Sheet: Sheet1
Gene Description	Gene Symbol
Beta-glucuronidase	GUSB
Monoamine oxidase A	MAOA
Kruppel-like factor 5	KLF5
Tyrosyl-DNA phosphodiesterase 1	TDP1
DNA-(apurinic or apyrimidinic site) lyase	APEX1
Nuclear factor erythroid 2-related factor 2	NFE2L2
Endoplasmic reticulum-associated amyloid beta-peptide-binding protein	ERAP1
Pregnane X receptor	NR1I2
Transcription intermediary factor 1-alpha	TRIM24
Nuclear factor NF-kappa-B p105 subunit	NFKB1
Transthyretin	TTR
Glycine transporter 2	SLC6A5
DNA topoisomerase II alpha	TOP2A
Proteasome component C5	PSMC2
Dipeptidyl peptidase IX	DPP9
Cathepsin D	CTSD
Peptidyl-prolyl cis-trans isomerase NIMA-interacting 1	PIN1
Macrophage migration inhibitory factor	MIF
Dipeptidyl peptidase VIII	DPP8
Arachidonate 12-lipoxygenase	ALOX12
Dual specificity protein kinase CLK4	CLK4
Cyclooxygenase-1	PTGS1
Glycine receptor subunit alpha-1	GLRA1
Arachidonate 5-lipoxygenase	ALOX5
Nuclear receptor ROR-beta	RORB
Serotonin 2c (5-HT2c) receptor	HTR2C
G-protein coupled bile acid receptor 1	GPBAR1
Proteasome Macropain subunit	PSMA1
Signal transducer and activator of transcription 1-alpha/beta	STAT1
Quinone reductase 2	NQO2
Neuronal acetylcholine receptor; alpha4/beta4	CHRNA4
Formyl peptide receptor 1	FPR1
Xanthine dehydrogenase	XDH
Nuclear receptor subfamily 4 group A member 1	NR4A1
Glucose transporter	SLC2A1
ADAM10	ADAM10
PI3-kinase p110-alpha/p85-alpha	PIK3CA
Cytochrome P450 2A6	CYP2A6
Glutaminase kidney isoform, mitochondrial	GLS
Sodium channel protein type III alpha subunit	SCN3A
LSD1/CoREST complex	KDM1A
IgG receptor FcRn large subunit p51	FCGRT
Thyroid hormone receptor alpha	THRA
Nitric oxide synthase, inducible	NOS2
Platelet-derived growth factor receptor alpha	PDGFRA
Methionine aminopeptidase 2	METAP2
Lipoxin A4 receptor	ALX1
Dual specificity mitogen-activated protein kinase kinase 2	MAP2K2
Vascular endothelial growth factor receptor 1	FLT1
Mineralocorticoid receptor	NR3C2
C-C chemokine receptor type 2	CCR2
Relaxin receptor 1	RXFP1
NT-3 growth factor receptor	NTRK3
Multidrug resistance-associated protein 1	ABCC1
Acetyl-CoA carboxylase 2	ACACA
Tyrosine-protein kinase FGR	FGR
SUMO-activating enzyme	UBA2
Glutathione S-transferase Pi	GSTP1
C-C chemokine receptor type 1	CCR1
Glutamate receptor ionotropic, AMPA 2	GRIA2
Acetylcholine receptor; alpha1/beta1/delta/gamma	CHRNA1
Dual specificity phosphatase Cdc25C	CDC25C
C5a anaphylatoxin chemotactic receptor	C5AR1
Cytochrome P450 3A4	CYP3A4
Phosphodiesterase 3B	PDE3B
Glutamate NMDA receptor; GRIN1/GRIN2B	GRIN1
Casein kinase II alpha/beta	CSNK2A1
Tissue factor pathway inhibitor	TFPI
Phosphodiesterase 11A	PDE11A
Endoplasmic reticulum aminopeptidase 1	ERAP1
Lysosomal Pro-X carboxypeptidase	PRCP
MAP kinase ERK2	MAPK1
Toll-like receptor 4	TLR4
G protein-coupled receptor kinase 5	GRK5
Ribosomal protein S6 kinase alpha 5	RPS6KA5
BMP-2-inducible protein kinase	BMP2K
Adenosylhomocysteinase	AHCY
Phosphodiesterase 3A	PDE3A
Excitatory amino acid transporter 3	SLC1A1
Sphingosine 1-phosphate receptor Edg-8	S1PR4
（内容由AI生成，仅供参考）
