# Supplementary material
Source: Research Square preprint supplement (doi:10.21203/rs.3.rs-9167967/v1)
Supplement: Supplementary file 5 [file beb94b5a9cc5ad56742a0cbe.xlsx]

## Sheet: Table S4
	gene	degree	degree_rank	betweenness	betweenness_rank	pagerank	pagerank_rank	composite_rank	community
1	ESR1	98	1	891.441817179489	1	0.0465760408103979	1	1	6
2	EGFR	86	2	403.630191662706	2	0.037544965761169	2	2	1
3	NFKB1	74	3	240.453224057623	5	0.0316056224873188	3	3.66666666666667	1
4	ERBB2	70	4	246.036000279492	4	0.030696814316671	4	4	4
5	MMP9	68	5	197.261715523902	7	0.0293898783501742	5	5.66666666666667	2
6	GSK3B	64	6	191.334662625308	8	0.0279364496825981	6	6.66666666666667	3
7	TLR4	54	9	212.416036342218	6	0.0252578933701467	7	7.33333333333333	2
8	PIK3CA	58	7	111.977942438142	11	0.0247002792769039	8	8.66666666666667	3
9	MAPK1	56	8	96.251870044414	13	0.0239188161944447	9	10	3
10	PARP1	52	10	87.770712775987	14	0.0224856970932156	10	11.3333333333333	5
11	STAT1	48	11	71.3654578363059	16	0.0206900548570593	11	12.6666666666667	3
12	SLC2A1	30	23	269.681913518422	3	0.0171445897627689	14	13.3333333333333	4
13	KDR	48	11	54.6698246078429	18	0.020641233499789	12	13.6666666666667	4
14	MMP2	48	11	49.5553197438813	19	0.0205974157848785	13	14.3333333333333	4
15	CDK4	38	14	48.2165836483757	20	0.0166927987325112	15	16.3333333333333	5
16	NFE2L2	36	15	47.2658581522395	21	0.0162612244585992	17	17.6666666666667	1
17	CYP3A4	26	26	121.167987285127	10	0.0150971601099347	21	19	1
18	ESR2	36	15	37.9484891574555	28	0.016309036787826	16	19.6666666666667	3
19	FYN	34	18	46.6802510227531	22	0.0151991311358315	20	20	3
20	CDK2	36	15	34.899782940871	31	0.0155564729883224	18	21.3333333333333	5
21	PTGS1	22	27	111.911997852306	12	0.0123307879598486	27	22	2
22	TOP2A	34	18	37.6431796489839	29	0.0152418057884208	19	22	5
23	AURKA	32	21	36.7493370081144	30	0.0144604990950874	23	24.6666666666667	5
24	FGR	22	27	67.8438519693865	17	0.0116788430919529	30	24.6666666666667	2
25	MET	34	18	19.2212141347316	35	0.0148741642733617	22	25	4
26	ALOX5	22	27	42.0874783043594	24	0.0117055933490124	28	26.3333333333333	2
27	XDH	22	27	41.2924420565745	26	0.011681584110159	29	27.3333333333333	1
28	GSTP1	22	27	41.5086263109345	25	0.0111966447169352	31	27.6666666666667	1
29	FLT1	32	21	15.3675468604908	39	0.014233030113206	24	28	4
30	LCK	30	23	18.9220106301506	37	0.0134037343528602	25	28.3333333333333	3
31	CCR2	28	25	19.7918135288595	34	0.0129972109854946	26	28.3333333333333	2
32	AKR1C3	14	48	188.168436566987	9	0.0111024205504364	32	29.6666666666667	6
33	CDC25A	22	27	12.7167149780849	40	0.0107088178148139	33	33.3333333333333	5
34	CCR1	22	27	8.08686739200034	44	0.0106298517787271	34	35	2
35	PDGFRA	22	27	9.27025535101197	42	0.0100751509829127	38	35.6666666666667	4
36	AURKB	22	27	7.9443494137193	45	0.010287538017486	35	35.6666666666667	5
37	PTPN1	22	27	5.83000113819548	50	0.0101339404172157	37	38	3
38	CSNK2A1	22	27	4.57571198048367	54	0.0101758617445559	36	39	5
39	MAOA	14	48	40.5520292171332	27	0.00893074744301916	45	40	1
40	FPR1	20	38	7.40228791192658	47	0.0100542568456899	39	41.3333333333333	2
41	AKR1B1	16	44	15.6582397479598	38	0.00894568951149567	43	41.6666666666667	1
42	MAP2K2	16	44	20.3687134200832	32	0.00829385763934759	49	41.6666666666667	3
43	RET	18	41	8.10070376819603	43	0.00893669613706757	44	42.6666666666667	3
44	CDC25C	20	38	4.70480336321511	53	0.00939454140447974	40	43.6666666666667	5
45	CA9	18	41	6.39431287666582	49	0.00919828375803451	42	44	4
46	CTSD	16	44	9.27293077293077	41	0.00836688789463023	48	44.3333333333333	6
47	NOS2	18	41	6.61940462484799	48	0.00889677946236186	46	45	1
48	CYP2A6	12	56	20.2498321939498	33	0.00847287075168092	47	45.3333333333333	1
49	MMP1	20	38	1.59418498168498	62	0.00938937797747263	41	47	4
50	ALOX12	12	56	19.0982075372168	36	0.00821036461097886	50	47.3333333333333	2
51	NR3C2	10	62	43.4856780425434	23	0.00696043212778016	57	47.3333333333333	6
52	ALPL	6	71	84.9666666666667	15	0.0066748300399681	60	48.6666666666667	2
53	TRIM24	14	48	5.08279144583238	52	0.00766948628392401	52	50.6666666666667	3
54	PDPK1	16	44	3.11781396049726	59	0.00782015003936345	51	51.3333333333333	3
55	RPS6KB2	14	48	2.37192450057121	61	0.00706401177358541	56	55	3
56	APEX1	14	48	1.22545503869033	63	0.00715709797294319	54	55	5
57	KDM1A	14	48	1.18968253968254	64	0.00728859329450286	53	55	5
58	KLF5	12	56	5.74360155668205	51	0.00655493535034311	61	56	1
59	HDAC4	14	48	0.998863990040461	66	0.00708124325941814	55	56.3333333333333	3
60	NR1I2	10	62	7.93421510861897	46	0.00652646649451487	62	56.6666666666667	1
61	FLT4	14	48	0.405194805194805	70	0.00692117488463551	58	58.6666666666667	4
62	TTR	10	62	4.14188219188219	55	0.00624127707918294	65	60.6666666666667	1
63	ABCC1	10	62	3.6980715195724	56	0.00617560055393681	67	61.6666666666667	1
64	C5AR1	12	56	0.142857142857143	72	0.00673901348929427	59	62.3333333333333	2
65	MIF	10	62	2.38270757020757	60	0.00584832625299473	68	63.3333333333333	2
66	AKR1C2	6	71	3.42613636363636	57	0.00634523442601603	63	63.6666666666667	6
67	ADAM10	12	56	0.283333333333333	71	0.00617962962825812	66	64.3333333333333	4
68	ELANE	12	56	0	74	0.00631764061710615	64	64.6666666666667	2
69	AURKC	10	62	0	74	0.00553276672830695	69	68.3333333333333	5
70	GUSB	8	68	0.462386269644334	69	0.00493998760705105	70	69	6
71	NR4A1	8	68	0.638888888888889	68	0.00489603623323097	71	69	1
72	ACACA	4	75	3.3768115942029	58	0.00386078371906544	77	70	4
73	NTRK3	8	68	0.0833333333333333	73	0.00480782506046724	73	71.3333333333333	3
74	CYP11B2	4	75	1.06666666666667	65	0.00425754650784787	76	72	6
75	ALOX15B	6	71	0	74	0.00474661370334477	74	73	2
76	CA12	6	71	0	74	0.00437432726022367	75	73.3333333333333	4
77	AKR1C4	4	75	0	74	0.00487208946682978	72	73.6666666666667	6
78	METAP2	4	75	0.801911087015451	67	0.00336157326604761	80	74	6
79	HTR2C	4	75	0	74	0.00379769189026976	78	75.6666666666667	1
80	FCGRT	4	75	0	74	0.00321378396909989	81	76.6666666666667	1
81	TNKS2	4	75	0	74	0.00320329325202798	82	77	5
82	ALPG	2	82	0	74	0.00361732382394416	79	78.3333333333333	2
83	GLS	2	82	0	74	0.00269764873251011	83	79.6666666666667	4
84	PDE11A	2	82	0	74	0.00253407370763017	84	80	6
85	ADORA2A	2	82	0	74	0.00253407370763017	85	80.3333333333333	6
86	ERAP1	2	82	0	74	0.00252127788168004	86	80.6666666666667	2
87	ST6GAL1	0	87	0	74	0.00172612197928654	87	82.6666666666667	7
88	CA3	0	87	0	74	0.00172612197928654	87	82.6666666666667	8
89	DPP9	0	87	0	74	0.00172612197928654	87	82.6666666666667	9
90	DPP8	0	87	0	74	0.00172612197928654	87	82.6666666666667	10
91	NQO2	0	87	0	74	0.00172612197928654	87	82.6666666666667	11
92	AHCY	0	87	0	74	0.00172612197928654	87	82.6666666666667	12
