# Supplementary material
Source: Research Square preprint supplement (doi:10.21203/rs.3.rs-9167967/v1)
Supplement: Supplementary file 6 [file c420510cfecc56428cb6e6b2.xlsx]

## Sheet: SwissTargetPrediction
Target	Common name	Uniprot ID	ChEMBL ID	Target Class	Probability*	Known actives (3D/2D)
Epidermal growth factor receptor erbB1	EGFR	P00533	CHEMBL203	Kinase	0.0809861066775	130 / 18
Carbonic anhydrase VI	CA6	P23280	CHEMBL3025	Lyase	0.0714808399531	6 / 14
Aldo-keto reductase family 1 member B10	AKR1B10	O60218	CHEMBL5983	Enzyme	0.0619466223505	1 / 18
Protein-tyrosine phosphatase 1B	PTPN1	P18031	CHEMBL335	Phosphatase	0.0619466223505	3 / 3
Carbonic anhydrase VB	CA5B	Q9Y2D0	CHEMBL3969	Lyase	0.0524239602665	7 / 13
Carbonic anhydrase VA	CA5A	P35218	CHEMBL4789	Lyase	0.0524239602665	10 / 13
Tyrosine-protein kinase LCK	LCK	P06239	CHEMBL258	Kinase	0.0524239602665	21 / 6
Tyrosine-protein kinase FYN	FYN	P06241	CHEMBL1841	Kinase	0.0524239602665	0 / 2
Aldo-keto reductase family 1 member C4	AKR1C4	P17516	CHEMBL4999	Enzyme	0.0524239602665	0 / 1
Aldo-keto reductase family 1 member C2	AKR1C2	P52895	CHEMBL5847	Enzyme	0.0524239602665	0 / 1
Estrogen receptor alpha	ESR1	P03372	CHEMBL206	Nuclear receptor	0.0524239602665	63 / 12
Estrogen receptor beta	ESR2	Q92731	CHEMBL242	Nuclear receptor	0.0428942118511	72 / 6
Cyclooxygenase-1	PTGS1	P23219	CHEMBL221	Oxidoreductase	0.0428942118511	12 / 17
Norepinephrine transporter	SLC6A2	P23975	CHEMBL222	Electrochemical transporter	0.0428942118511	2 / 2
Receptor protein-tyrosine kinase erbB-2	ERBB2	P04626	CHEMBL1824	Kinase	0.0428942118511	15 / 2
Vascular endothelial growth factor receptor 1	FLT1	P17948	CHEMBL1868	Kinase	0.0428942118511	9 / 0
Vascular endothelial growth factor receptor 3	FLT4	P35916	CHEMBL1955	Kinase	0.0428942118511	3 / 0
Platelet-derived growth factor receptor alpha	PDGFRA	P16234	CHEMBL2007	Kinase	0.0428942118511	4 / 0
Serine/threonine-protein kinase Aurora-B	AURKB	Q96GD4	CHEMBL2185	Kinase	0.0428942118511	8 / 0
Vascular endothelial growth factor receptor 2	KDR	P35968	CHEMBL279	Kinase	0.0428942118511	91 / 0
Serine/threonine-protein kinase Aurora-C	AURKC	Q9UQB9	CHEMBL3935	Kinase	0.0428942118511	2 / 0
Serine/threonine-protein kinase Aurora-A	AURKA	O14965	CHEMBL4722	Kinase	0.0428942118511	22 / 0
Carbonic anhydrase IV	CA4	P22748	CHEMBL3729	Lyase	0.0428942118511	15 / 6
Beta-glucuronidase	GUSB	P08236	CHEMBL2728	Enzyme	0.0428942118511	5 / 0
Phospholipase A-2-activating protein	PLAA	Q9Y263	CHEMBL6114	Unclassified protein	0.0428942118511	11 / 0
Transthyretin	TTR	P02766	CHEMBL3194	Secreted protein	0.0428942118511	3 / 5
Hepatocyte growth factor receptor	MET	P08581	CHEMBL3717	Kinase	0.0428942118511	69 / 22
Aldo-keto-reductase family 1 member C3	AKR1C3	P42330	CHEMBL4681	Enzyme	0.0428942118511	1 / 17
Carbonic anhydrase XIII (by homology)	CA13	Q8N1Q1	CHEMBL3912	Lyase	0.0428942118511	5 / 9
Leukocyte elastase	ELANE	P08246	CHEMBL248	Protease	0.0428942118511	4 / 2
Cyclin-dependent kinase 4	CDK4	P11802	CHEMBL331	Kinase	0.0428942118511	13 / 0
Cyclin-dependent kinase 2	CDK2	P24941	CHEMBL301	Kinase	0.0428942118511	40 / 0
Beta-galactoside alpha-2,6-sialyltransferase 1	ST6GAL1	P15907	CHEMBL3596075	Transferase	0.0428942118511	2 / 0
Platelet-derived growth factor receptor	PDGFRA PDGFRB	P16234 P09619	CHEMBL2095189	Kinase	0.0428942118511	4 / 0
Transmembrane domain-containing protein TMIGD3	TMIGD3	P0DMS9	CHEMBL3712907	Unclassified protein	0.0428942118511	5 / 0
Alkaline phosphatase, tissue-nonspecific isozyme	ALPL	P05186	CHEMBL5979	Enzyme	0.0428942118511	26 / 0
Poly [ADP-ribose] polymerase-1	PARP1	P09874	CHEMBL3105	Enzyme	0.0428942118511	39 / 0
Tankyrase-2	TNKS2	Q9H2K2	CHEMBL6154	Enzyme	0.0428942118511	12 / 0
Tankyrase-1	TNKS	O95271	CHEMBL6164	Enzyme	0.0428942118511	12 / 0
Alkaline phosphatase placental-like	ALPG	P10696	CHEMBL3402	Enzyme	0.0428942118511	6 / 0
D-amino-acid oxidase	DAO	P14920	CHEMBL5485	Enzyme	0.0428942118511	32 / 0
MAP kinase ERK2	MAPK1	P28482	CHEMBL4040	Kinase	0.0428942118511	2 / 1
Macrophage migration inhibitory factor	MIF	P14174	CHEMBL2085	Enzyme	0.0428942118511	26 / 1
Adenosine A1 receptor	ADORA1	P30542	CHEMBL226	Family A G protein-coupled receptor	0.0428942118511	39 / 1
Metabotropic glutamate receptor 4	GRM4	Q14833	CHEMBL2736	Family C G protein-coupled receptor	0.0428942118511	3 / 0
Carbonic anhydrase III	CA3	P07451	CHEMBL2885	Lyase	0.0428942118511	2 / 3
Histone deacetylase 4	HDAC4	P56524	CHEMBL3524	Eraser	0.0428942118511	16 / 0
Runt-related transcription factor 1/Core-binding factor subunit beta	CBFB	Q13951	CHEMBL1615386	Unclassified protein	0.0428942118511	2 / 0
Ribosomal protein S6 kinase 2	RPS6KB2	Q9UBS0	CHEMBL3111	Kinase	0.0428942118511	1 / 0
Dual specificity phosphatase Cdc25A	CDC25A	P30304	CHEMBL3775	Phosphatase	0.0428942118511	8 / 0
Adenosine A2a receptor	ADORA2A	P29274	CHEMBL251	Family A G protein-coupled receptor	0.0428942118511	24 / 1
Cyclin-dependent kinase 5/CDK5 activator 1	CDK5R1 CDK5	Q15078 Q00535	CHEMBL1907600	Kinase	0.0428942118511	32 / 0
G protein-coupled receptor kinase 6	GRK6	P43250	CHEMBL6144	Kinase	0.0428942118511	1 / 0
Xanthine dehydrogenase	XDH	P47989	CHEMBL1929	Oxidoreductase	0.0428942118511	23 / 0
3-phosphoinositide dependent protein kinase-1	PDPK1	O15530	CHEMBL2534	Kinase	0.0428942118511	13 / 0
Glycogen synthase kinase-3 beta	GSK3B	P49841	CHEMBL262	Kinase	0.0428942118511	71 / 9
Arachidonate 15-lipoxygenase, type II	ALOX15B	O15296	CHEMBL2457	Enzyme	0.0428942118511	1 / 0
Kinesin-1 heavy chain/ Tyrosine-protein kinase receptor RET	RET	P07949	CHEMBL2041	Kinase	0.0428942118511	46 / 0
Cytochrome P450 11B2	CYP11B2	P19099	CHEMBL2722	Cytochrome P450	0.0428942118511	30 / 0
G-protein coupled receptor 84	GPR84	Q9NQS5	CHEMBL3714079	Family A G protein-coupled receptor	0.0428942118511	19 / 0
Dual-specificity tyrosine-phosphorylation regulated kinase 1A	DYRK1A	Q13627	CHEMBL2292	Kinase	0.0428942118511	56 / 8
Dual specificity tyrosine-phosphorylation-regulated kinase 1B	DYRK1B	Q9Y463	CHEMBL5543	Kinase	0.0428942118511	22 / 7
Carbonic anhydrase II	CA2	P00918	CHEMBL205	Lyase	0.22387	150 / 11
Carbonic anhydrase VII	CA7	P43166	CHEMBL2326	Lyase	0.22387	21 / 18
Carbonic anhydrase I	CA1	P00915	CHEMBL261	Lyase	0.22387	116 / 14
Carbonic anhydrase XII	CA12	O43570	CHEMBL3242	Lyase	0.22387	63 / 13
Carbonic anhydrase XIV	CA14	Q9ULX7	CHEMBL3510	Lyase	0.22387	24 / 16
Carbonic anhydrase IX	CA9	Q16790	CHEMBL3594	Lyase	0.22387	76 / 17
Aldose reductase	AKR1B1	P15121	CHEMBL1900	Enzyme	0.166714	47 / 31
Arachidonate 5-lipoxygenase	ALOX5	P09917	CHEMBL215	Oxidoreductase	0.157119	91 / 21
Monoamine oxidase B	MAOB	P27338	CHEMBL2039	Oxidoreductase	0.12864	93 / 12
Matrix metalloproteinase 9	MMP9	P14780	CHEMBL321	Protease	0.100058	92 / 17
Matrix metalloproteinase 1	MMP1	P03956	CHEMBL332	Protease	0.100058	91 / 19
Matrix metalloproteinase 2	MMP2	P08253	CHEMBL333	Protease	0.100058	96 / 19
